# Supplementary material
Source: PubMed Central journal article supplement (PMC2924912)
Supplement: NIHMS219368-supplement-4.pdf [file NIHMS219368-supplement-4.pdf]

**Supplemental movie legends**

Movie #1. Movie from a series of static fluorescent images depicting altered lymphatic drainage pathway to the brachial LN. As shown in this Movie, ICG was injected intradermally into the base of the mouse tail and dynamic NIR fluorescence imaging was conducted with 200 ms exposure times. Fluorescent lymphatic vessels drain partially to the inguinal LN basin. ICG-labeled lymph also bypasses the primary tumor and reaches the brachial LN through tortuous and dilated lymphatic vessels. Note the specific ICG staining patterns of the brachial LN.

**Supplemental figure captions**

Supplemental Figure 1: Non-overlaid, pseudo colored fluorescence imaging of Figure 2 (B) showing more clearly the axillary lymph nodes.

Supplemental Figure 2: A fluorescent image of relatively well defined collecting lymphatic vessels in a tumor-free mouse. *Broken arrow*: collecting lymphatic vessels.
